# Supplementary material
Source: MDPI journal article supplement (https://www.mdpi.com/2571-6131/6/1/35)
Supplement: s1 [file s1]

# Bucchero Ware from the Etruscan Town of Tarquinia (Italy): A Study of the Production Site and Technology through Spectroscopic Techniques and Multivariate Data Analysis

Margherita Longoni <sup>1</sup>, Noemi Calore <sup>1</sup>, Matilde Marzullo <sup>2</sup>, Daniele Teseo <sup>3</sup>, Veronica Duranti <sup>3</sup>, Giovanna Bagnasco Gianni <sup>2</sup> and Silvia Bruni <sup>1,\*</sup>

<sup>1</sup> Dipartimento di Chimica, Università degli Studi di Milano, Via C. Golgi, 19, 20133 Milan, Italy

<sup>2</sup> Dipartimento di Beni Culturali e Ambientali—Sezione di Archeologia, Università degli Studi di Milano, Via Festa del Perdono, 7, 20122 Milan, Italy

<sup>3</sup> “Progetto Tarquinia”, Università degli Studi di Milano, Via Festa del Perdono, 7, 20122 Milan, Italy

\* Correspondence: [silvia.bruni@unimi.it](mailto:silvia.bruni@unimi.it)

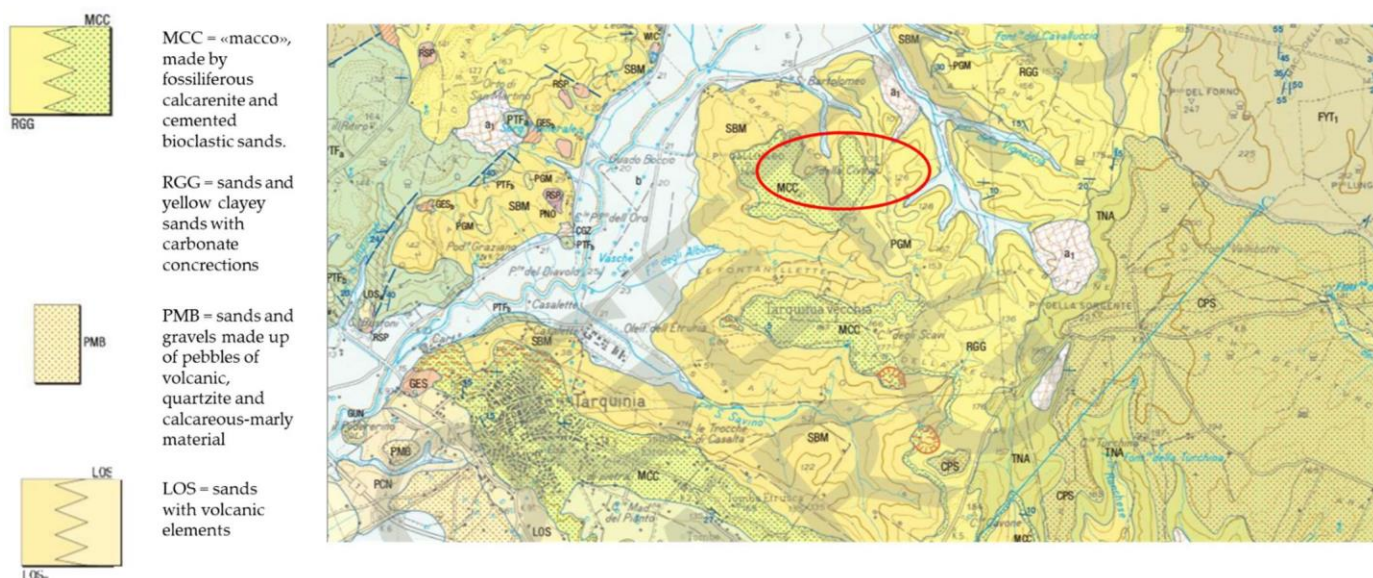

**Figure S1.** Detail of the geological map of the area of Tarquinia (central Italy) [28]. The red ellipse indicates the site of La Civita.

**Table S1.** Elemental composition data, expressed as percent in weight and normalized to 100%, for the bucchero samples from the excavation of La Civita di Tarquinia. For the more abundant elements the percentages of the corresponding oxides were considered.

| Sample | CaO  | Fe <sub>2</sub> O <sub>3</sub> | MgO  | K <sub>2</sub> O | Na <sub>2</sub> O | Cr    | Cu    | Ni    | Mn   |
|--------|------|--------------------------------|------|------------------|-------------------|-------|-------|-------|------|
| 1      | 18.2 | 41.5                           | 2.0  | 28.1             | 9.8               | 0.102 | 0.115 | 0.075 | 0.16 |
| 3      | 13.8 | 46.6                           | 3.8  | 25.5             | 10.0              | 0.053 | 0.034 | 0.036 | 0.23 |
| 3/2    | 61.5 | 22.6                           | 5.0  | 7.0              | 3.4               | 0.075 | 0.088 | 0.041 | 0.33 |
| 7/4    | 62.0 | 21.1                           | 6.2  | 7.1              | 3.2               | 0.054 | 0.056 | 0.028 | 0.23 |
| 9      | 53.0 | 23.1                           | 6.6  | 13.3             | 3.6               | 0.055 | 0.045 | 0.020 | 0.24 |
| 12/163 | 64.2 | 18.5                           | 6.5  | 6.7              | 3.8               | 0.044 | 0.076 | 0.035 | 0.21 |
| 13     | 51.3 | 24.1                           | 7.5  | 14.1             | 2.2               | 0.045 | 0.049 | 0.023 | 0.57 |
| 15/1/2 | 63.7 | 18.7                           | 5.8  | 7.6              | 3.8               | 0.063 | 0.063 | 0.046 | 0.35 |
| 19     | 9.9  | 42.5                           | 6.4  | 31.0             | 9.5               | 0.036 | 0.021 | 0.025 | 0.57 |
| 22     | 45.7 | 26.1                           | 8.5  | 15.7             | 3.5               | 0.037 | 0.012 | 0.020 | 0.38 |
| 125/22 | 47.9 | 28.9                           | 10.4 | 8.1              | 4.0               | 0.082 | 0.080 | 0.045 | 0.48 |
| 193/11 | 63.1 | 20.2                           | 6.9  | 6.8              | 2.6               | 0.059 | 0.037 | 0.033 | 0.22 |

|         |      |      |      |      |      |       |       |       |      |
|---------|------|------|------|------|------|-------|-------|-------|------|
| 197/6   | 17.5 | 51.6 | 7.7  | 15.7 | 6.9  | 0.042 | 0.176 | 0.162 | 0.28 |
| 202/7   | 64.9 | 19.7 | 5.9  | 6.6  | 2.5  | 0.064 | 0.049 | 0.036 | 0.27 |
| 215/4   | 69.8 | 15.4 | 4.0  | 7.3  | 3.2  | 0.031 | 0.053 | 0.077 | 0.12 |
| 339/18  | 41.7 | 33.3 | 7.4  | 12.5 | 4.4  | 0.058 | 0.131 | 0.081 | 0.48 |
| 437/122 | 58.4 | 24.6 | 5.2  | 7.9  | 3.5  | 0.034 | 0.044 | 0.086 | 0.29 |
| 632/34  | 68.7 | 15.2 | 5.1  | 6.8  | 3.8  | 0.078 | 0.033 | 0.045 | 0.24 |
| 663/2   | 15.2 | 48.3 | 7.7  | 19.6 | 8.4  | 0.109 | 0.171 | 0.078 | 0.50 |
| 681/49  | 8.6  | 55.9 | 7.2  | 19.8 | 7.6  | 0.138 | 0.156 | 0.074 | 0.61 |
| 763/1   | 7.6  | 53.6 | 8.5  | 21.4 | 8.2  | 0.065 | 0.164 | 0.037 | 0.42 |
| 779/1   | 39.3 | 35.0 | 8.3  | 11.8 | 4.8  | 0.106 | 0.068 | 0.044 | 0.65 |
| 801/10  | 47.2 | 26.5 | 8.0  | 14.6 | 2.7  | 0.067 | 0.412 | 0.000 | 0.55 |
| 801/11  | 51.2 | 26.2 | 8.6  | 10.7 | 2.7  | 0.065 | 0.001 | 0.002 | 0.58 |
| 801/16  | 54.2 | 25.1 | 7.8  | 9.9  | 2.4  | 0.063 | 0.002 | 0.000 | 0.53 |
| 845/1   | 39.0 | 36.3 | 5.7  | 12.9 | 5.8  | 0.009 | 0.060 | 0.064 | 0.30 |
| 845/2   | 62.8 | 20.0 | 5.5  | 7.8  | 3.5  | 0.069 | 0.057 | 0.045 | 0.31 |
| A40/2   | 2.7  | 49.4 | 15.9 | 19.3 | 11.9 | 0.156 | 0.180 | 0.076 | 0.32 |
| Aa10/30 | 37.2 | 31.9 | 11.3 | 14.8 | 4.1  | 0.115 | 0.110 | 0.047 | 0.47 |
| Ac10/23 | 6.3  | 45.0 | 9.5  | 28.1 | 9.9  | 0.086 | 0.348 | 0.061 | 0.57 |
| Ac23/22 | 56.4 | 22.3 | 7.0  | 10.7 | 3.1  | 0.075 | 0.177 | 0.047 | 0.28 |
| Ac23/31 | 65.2 | 16.9 | 5.1  | 7.3  | 4.8  | 0.051 | 0.077 | 0.313 | 0.27 |
| Ac54/43 | 53.5 | 22.5 | 6.9  | 13.5 | 3.0  | 0.062 | 0.073 | 0.029 | 0.44 |

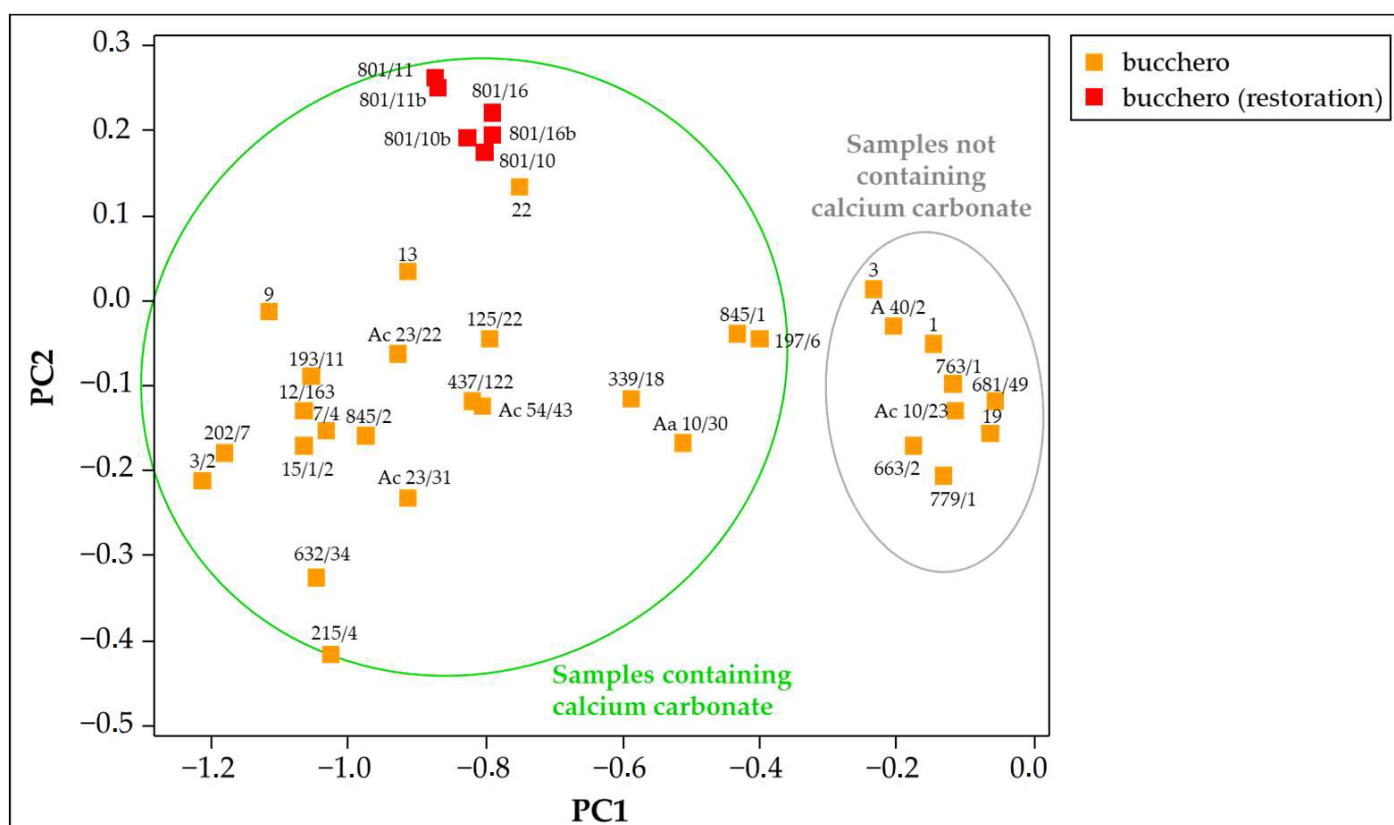

**Figure S2.** Score plot of the first two principal components of the second-derivative FTIR spectra of bucchero pottery (orange and red squares) from the excavation of La Civita di Tarquinia; the red squares indicate the bucchero samples examined in view of a virtual reconstruction (see text, Section 3.3.).

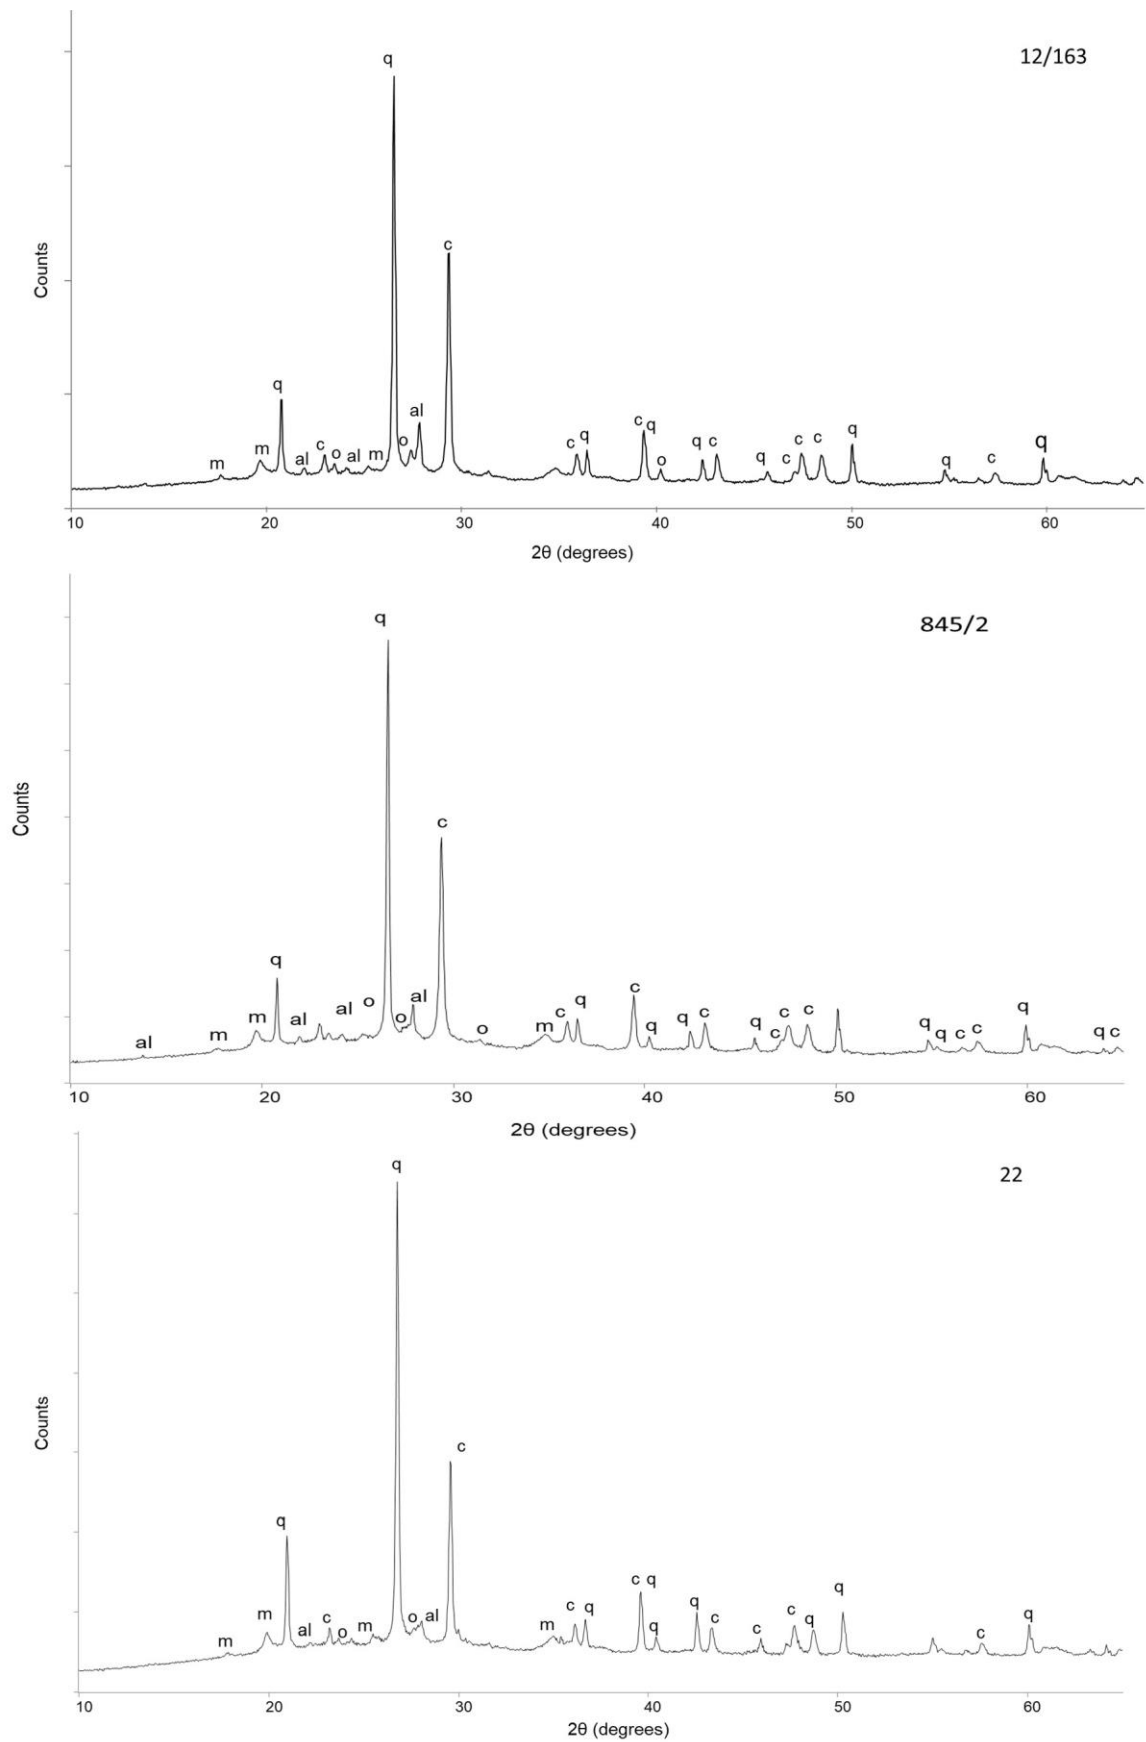

**Figure S3.** XRD patterns of bucchero samples from the excavation of La Civita di Tarquinia. Legend: al = albite; an = anorthite; c = calcite; f = Na-feldspar; m = muscovite; mi = microcline; o = orthoclase; q = quartz.

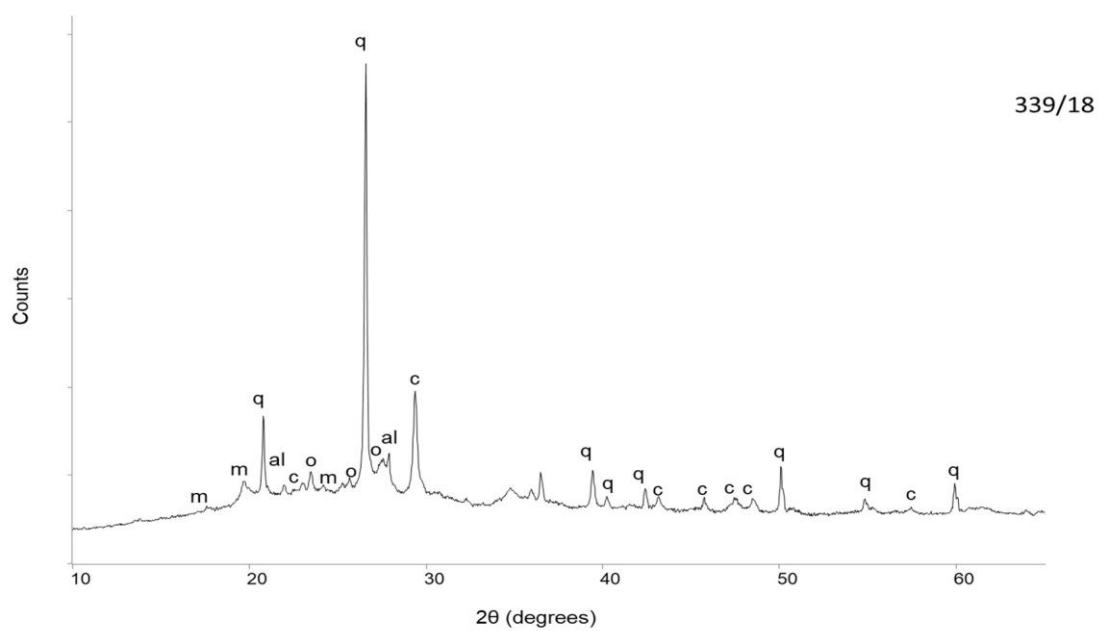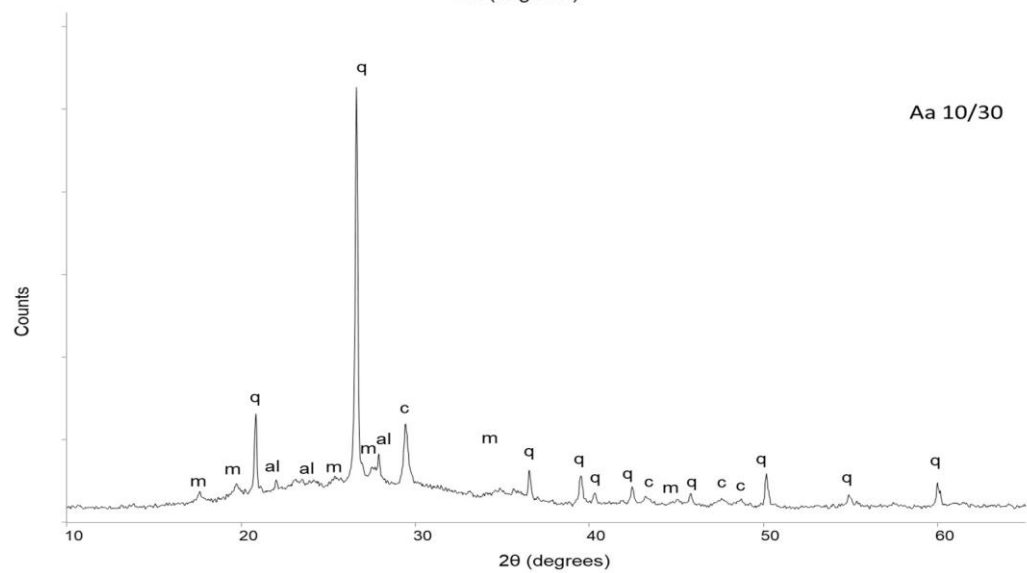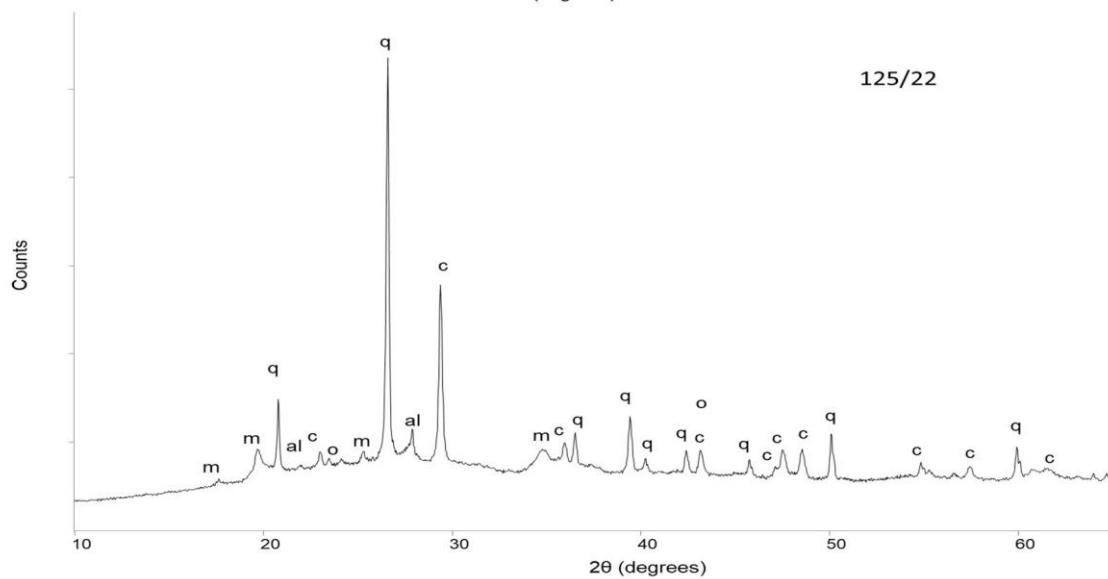

Figure S3. (continued).

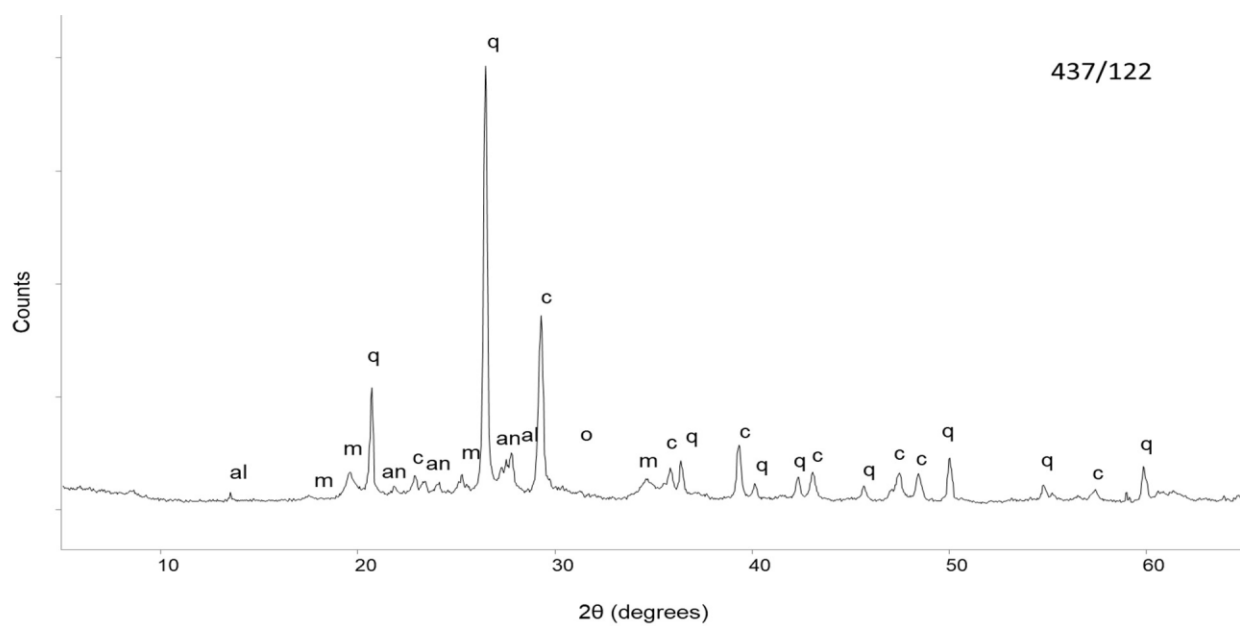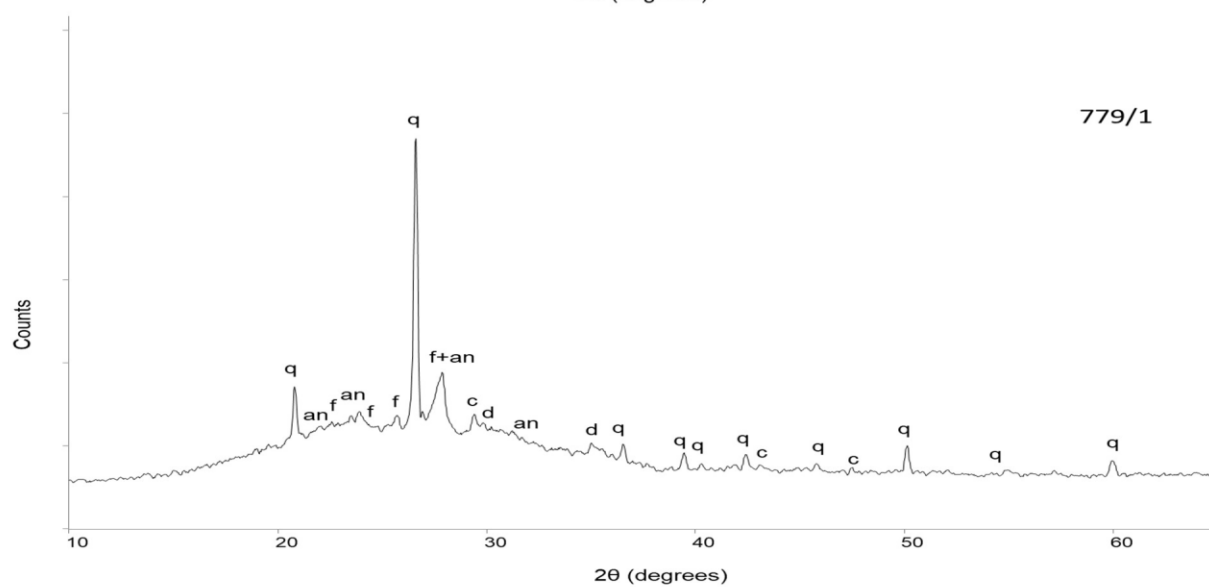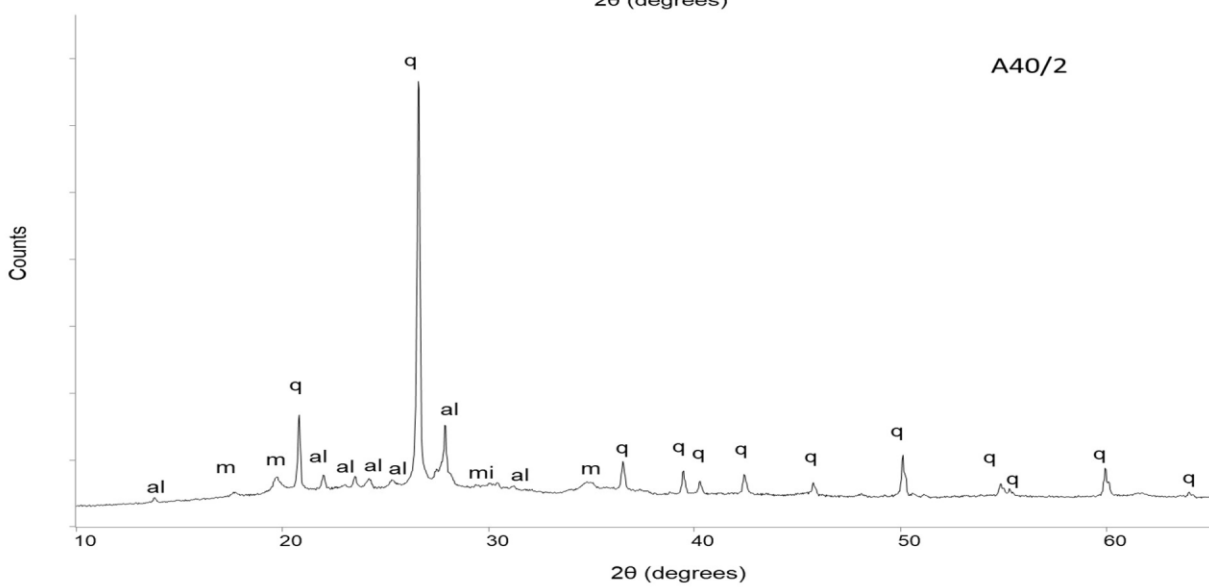

Figure S3. (continued).

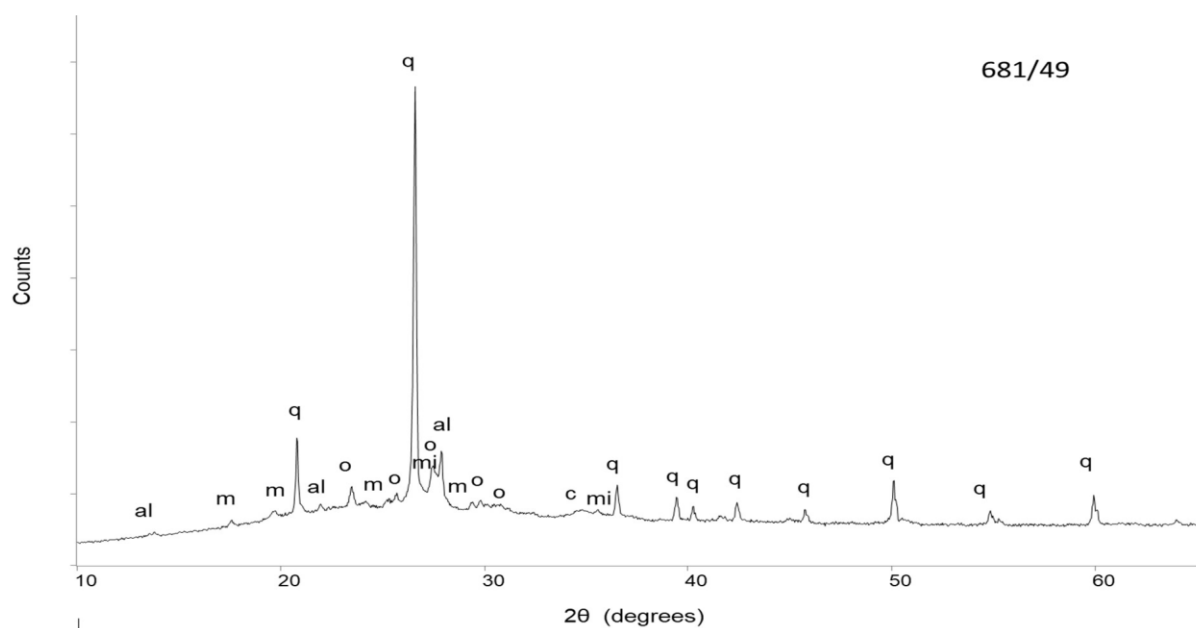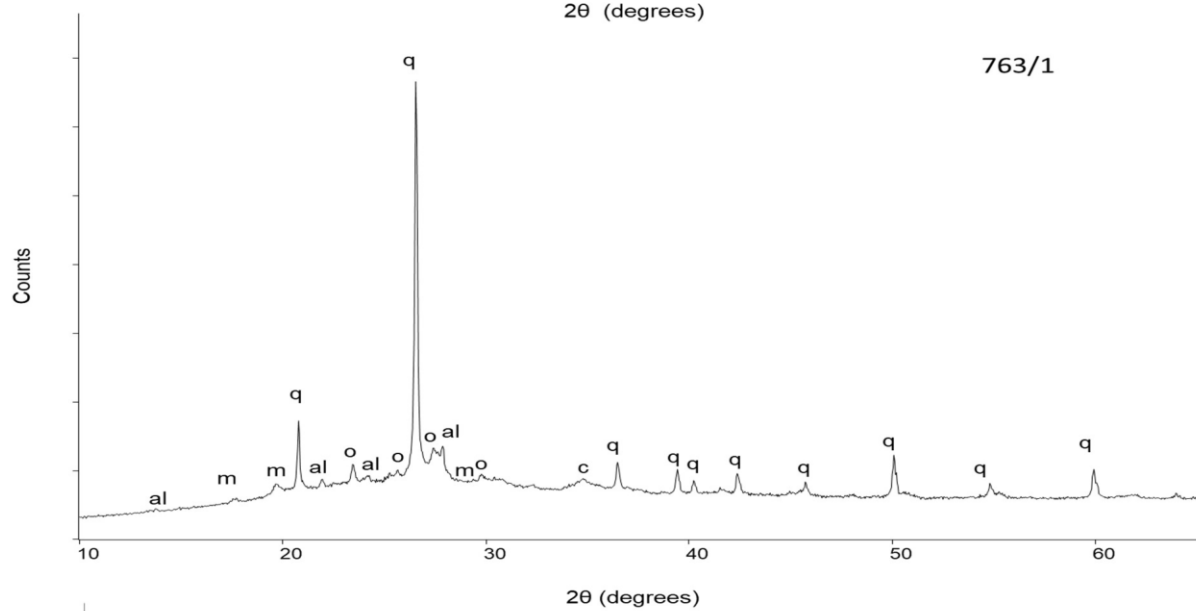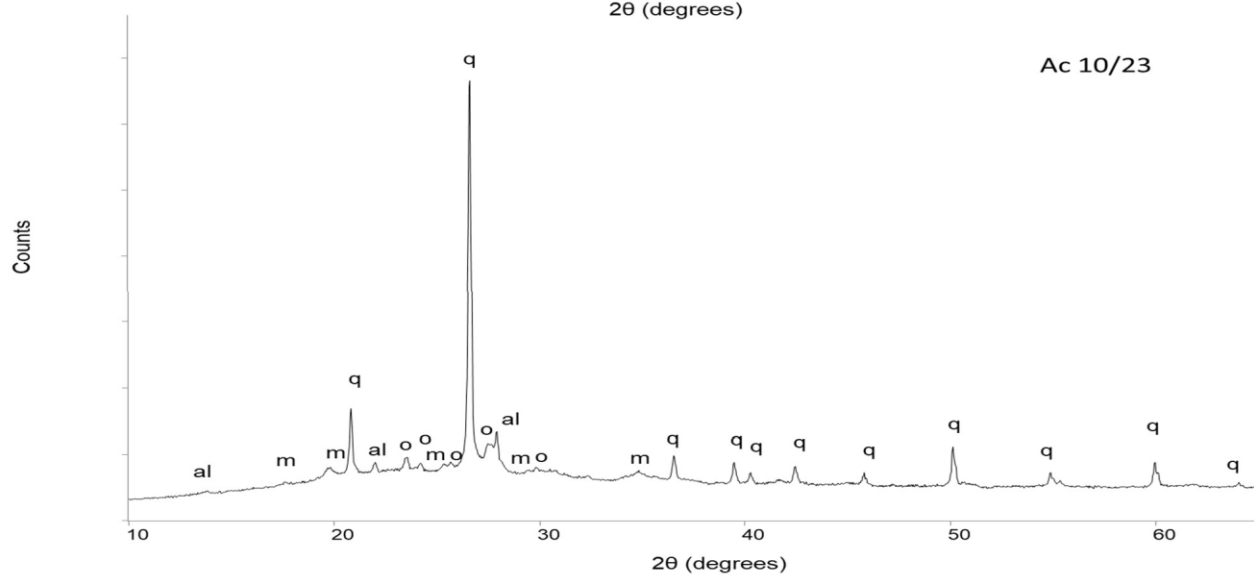

Figure S3. (continued).

**Table S2.** Positions and relative intensities of XRD peaks for bucchero samples from the excavation of La Civita di Tarquinia. The mineralogical phases identified are also indicated, with the ICDD numbers of the reference patterns.

| Samples |     |       |     |       |     |        |       |         |     |        |     |         |     | Reference phases (ICDD number) |
|---------|-----|-------|-----|-------|-----|--------|-------|---------|-----|--------|-----|---------|-----|--------------------------------|
| 12/163  |     | 845/2 |     | 22    |     | 339/18 |       | Aa10/30 |     | 125/22 |     | 437/122 |     |                                |
| 2θ      | I%  | 2θ    | I%  | 2θ    | I%  | 2θ     | I%    | 2θ      | I%  | 2θ     | I%  | 2θ      | I%  |                                |
| 17.70   | 8   | -     | -   | -     | -   | -      | -     | 17.69   | 6   | -      | -   | -       | -   | Muscovite 2M1 (01-080-0743)    |
| 19.70   | 11  | 19.71 | 12  | 19.75 | 12  | 19.70  | 16.00 | 19.72   | 8   | 19.71  | 12  | 19.64   | 7   | Muscovite 2M1                  |
| 20.79   | 25  | 20.79 | 24  | 20.80 | 31  | 20.80  | 30.00 | 20.87   | 24  | 20.79  | 24  | 20.76   | 26  | Quartz alpha (01-089-8935)     |
| 21.96   | 9   | 21.96 | 11  | -     | -   | 21.97  | 16    | 22.03   | 10  | 21.96  | 11  | 21.88   | 5   | Albite (00-009-0466)           |
| 23.01   | 12  | 23.00 | 13  | 23.08 | 12  | -      | -     | -       | -   | 23.00  | 13  | 22.93   | 8   | Calcite (01-072-1937)          |
| 23.51   | 10  | 23.48 | 11  | 23.49 | 11  | 23.49  | 18    | -       | -   | 23.48  | 11  | 23.43   | 7   | Albite                         |
| -       | -   | -     | -   | -     | -   | -      | -     | -       | -   | -      | -   | 24.14   | 6   | Albite Anorthite (01-073-0265) |
| -       | -   | -     | -   | -     | -   | -      | -     | -       | -   | -      | -   | 25.31   | 9   | Muscovite 2M1                  |
| -       | -   | -     | -   | -     | -   | 25.68  | 17    | -       | -   | -      | -   | -       | -   | Orthoclase (01-076-0825)       |
| 26.57   | 100 | 26.57 | 100 | 26.59 | 100 | 26.58  | 100   | 26.64   | 100 | 26.57  | 100 | 26.49   | 100 | Quartz alpha                   |
| -       | -   | 27.32 | 13  | -     | -   | -      | -     | -       | -   | 27.32  | 13  | 27.34   | 11  | Muscovite 2M1 Anorthite        |
| 27.43   | 13  | -     | -   | -     | -   | 27.49  | 21    | -       | -   | -      | -   | -       | -   | Orthoclase                     |
| -       | -   | -     | -   | -     | -   | -      | -     | -       | -   | -      | -   | 27.52   | 13  | Anorthite                      |
| 27.86   | 20  | 27.87 | 18  | 27.90 | 13  | 27.89  | 22    | 27.89   | 14  | 27.87  | 18  | 27.82   | 13  | Albite Anorthite               |
| 29.37   | 59  | 29.37 | 55  | 29.39 | 45  | 29.37  | 35    | 29.41   | 21  | 29.37  | 55  | 29.29   | 45  | Calcite                        |
| 34.85   | 10  | 34.81 | 11  | 34.88 | 11  | 34.78  | 15    | -       | -   | 34.81  | 11  | 34.66   | 7   | Muscovite 2M1                  |
| 35.95   | 13  | 35.94 | 14  | 35.97 | 13  | 35.95  | 15    | -       | -   | 35.94  | 14  | 35.89   | 9   | Calcite                        |
| 36.49   | 14  | 36.49 | 14  | 36.49 | 14  | 36.49  | 18    | 36.54   | 12  | 36.49  | 14  | 36.39   | 11  | Quartz alpha                   |
| 39.40   | 18  | 39.40 | 20  | 39.41 | 19  | 39.41  | 19    | 39.52   | 9   | 39.40  | 20  | 39.34   | 15  | Calcite; Quartz alpha          |
| 40.23   | 9   | 40.23 | 10  | 40.25 | 11  | 40.24  | 14    | 40.32   | 6   | 40.23  | 10  | 40.13   | 5   | Quartz alpha                   |
| 42.39   | 11  | 42.38 | 12  | 42.37 | 16  | 42.39  | 15    | 42.46   | 8   | 42.38  | 12  | 42.28   | 8   | Quartz alpha                   |
| 43.13   | 12  | 43.14 | 13  | 43.15 | 12  | 43.17  | 14    | 43.27   | 5   | 43.14  | 13  | 43.07   | 9   | Calcite                        |
| 45.74   | 9   | 45.73 | 10  | 45.74 | 11  | 45.74  | 13    | 45.78   | 7   | 45.73  | 10  | 45.67   | 5   | Quartz alpha                   |
| 47.50   | 13  | 47.47 | 13  | 47.51 | 13  | 47.50  | 13    | 47.57   | 5   | 47.47  | 13  | 47.37   | 9   | Calcite                        |
| 48.51   | 12  | 48.48 | 13  | 48.52 | 12  | 48.49  | 13    | 48.62   | 4   | 48.48  | 13  | 48.47   | 8   | Calcite                        |
| 50.08   | 15  | 50.08 | 17  | 50.09 | 16  | 50.09  | 19    | 50.12   | 12  | 50.08  | 17  | 50.01   | 12  | Quartz alpha                   |
| 54.81   | 9   | 54.81 | 10  | 54.81 | 11  | 54.82  | 13    | 54.83   | 5   | 54.81  | 10  | 54.77   | 5   | Quartz alpha                   |
| 55.27   | 7   | 55.27 | 8   | -     | -   | 55.28  | 12    | -       | -   | 55.27  | 8   | -       | -   | Quartz alpha                   |
| 56.57   | 7   | 56.57 | 8   | -     | -   | -      | -     | -       | -   | 56.57  | 8   | -       | -   | Calcite                        |
| 57.40   | 9   | 57.42 | 9   | 57.36 | 10  | 57.42  | 11    | -       | -   | 57.42  | 9   | 57.34   | 4   | Calcite                        |
| 59.89   | 12  | 59.88 | 13  | 59.89 | 13  | 59.91  | 16    | 59.96   | 9   | 59.88  | 13  | 59.84   | 10  | Quartz alpha                   |
| 63.97   | 7   | 63.97 | 8   | 63.97 | 9   | -      | -     | -       | -   | 63.97  | 8   | -       | -   | Quartz alpha                   |

**Table S2.** (continued).

| Sample 779/1 |     | Reference phases (ICDD number)        |  |
|--------------|-----|---------------------------------------|--|
| 2θ           | I%  |                                       |  |
| 20.84        | 31  | Quartz alpha (01-089-8935)            |  |
| 23.53        | 21  | Anorthite (01-073-0265)               |  |
| 23.96        | 22  | Feldspar (Na-component) (01-089-8575) |  |
| 25.74        | 23  | Feldspar (Na-component)               |  |
| 26.63        | 100 | Quartz alpha                          |  |
| 27.84        | 31  | Anorthite Feldspar (Na-component)     |  |
| 29.37        | 22  | Calcite                               |  |
| 29.86        | 20  | Diopside (01-089-0837)                |  |
| 35.03        | 15  | Diopside (01-089-0837)                |  |
| 36.63        | 14  | Quartz alpha                          |  |

|       |    |              |
|-------|----|--------------|
| 39.45 | 13 | Quartz alpha |
| 42.41 | 12 | Quartz alpha |
| 45.85 | 9  | Quartz alpha |
| 50.10 | 16 | Quartz alpha |
| 59.93 | 10 | Quartz alpha |

**Table S2.** (continued).

| Samples |     |        |     |       |     |         |     | Reference patterns (ICDD number)    |
|---------|-----|--------|-----|-------|-----|---------|-----|-------------------------------------|
| A40/2   |     | 681/49 |     | 763/1 |     | Ac10/23 |     |                                     |
| 2θ      | I%  | 2θ     | I%  | 2θ    | I%  | 2θ      | I%  |                                     |
| 17.61   | 8   | 17.58  | 11  | -     | -   | -       | -   | Muscovite 2M1 (01-080-0743)         |
| 19.70   | 11  | 19.70  | 12  | 19.67 | 13  | 19.80   | 13  | Muscovite 2M1                       |
| 20.82   | 25  | 20.80  | 28  | 20.79 | 26  | 20.83   | 26  | Quartz alpha (01-089-8935)          |
| 22.00   | 11  | -      | -   | 21.93 | 14  | 21.99   | 14  | Albite (00-009-0466)                |
| 23.53   | 11  | 23.48  | 18  | 23.47 | 17  | 23.55   | 15  | Albite                              |
| 24.21   | 11  | -      | -   | 24.21 | 14  | 24.23   | 14  | Albite Muscovite 2M1                |
| 25.29   | 10  | -      | -   | 25.26 | 15  | -       | -   | Albite                              |
| -       | -   | 25.69  | 16  | 25.69 | 16  | 25.68   | 14  | Orthoclase (01-076-0825)            |
| 26.61   | 100 | 26.59  | 100 | 26.57 | 100 | 26.61   | 100 | Quartz alpha                        |
| 27.47   | 13  | 27.49  | 21  | 27.43 | 20  | 27.48   | 18  | Microcline (01-076-1238) Orthoclase |
| 27.89   | 23  | 27.88  | 25  | 27.86 | 21  | 27.90   | 21  | Albite                              |
| -       | -   | -      | -   | 29.36 | 14  | -       | -   | Microcline                          |
| -       | -   | -      | -   | 29.79 | 15  | -       | -   | Orthoclase                          |
| 34.76   | 10  | -      | -   | 34.78 | 14  | 34.78   | 12  | Muscovite 2M1                       |
| 36.51   | 15  | 36.50  | 18  | 36.48 | 17  | 36.52   | 15  | Quartz alpha                        |
| 39.44   | 12  | 39.42  | 15  | 39.39 | 16  | 39.45   | 14  | Quartz alpha                        |
| 40.26   | 10  | 40.25  | 13  | 40.23 | 13  | 40.26   | 11  | Quartz alpha                        |
| 42.42   | 12  | 42.40  | 14  | 42.38 | 15  | 42.43   | 13  | Quartz alpha                        |
| 45.77   | 10  | 45.73  | 13  | 45.71 | 13  | 45.78   | 11  | Quartz alpha                        |
| 50.10   | 16  | 50.09  | 19  | 50.07 | 19  | 50.11   | 17  | Quartz alpha                        |
| 51.12   | 7   | -      | -   | -     | -   | -       | -   | Albite                              |
| 54.85   | 9   | 54.82  | 13  | 54.81 | 13  | 54.85   | 11  | Quartz alpha                        |
| 55.28   | 8   | 55.24  | 11  | -     | -   | -       | -   | Quartz alpha                        |
| 59.92   | 13  | 59.90  | 16  | 59.89 | 16  | 59.93   | 14  | Quartz alpha                        |
| 63.98   | 8   | 63.99  | 11  | 63.95 | 11  | 64.01   | 9   | Quartz alpha                        |
